# Supplementary material
Source: PubMed Central journal article supplement (PMC2448850)
Supplement: 0802302105_Supplemental_PDF.pdf [file 0802302105_Supplemental_PDF.pdf]

# Supporting Information

Bajo et al. 10.1073/pnas.0802302105

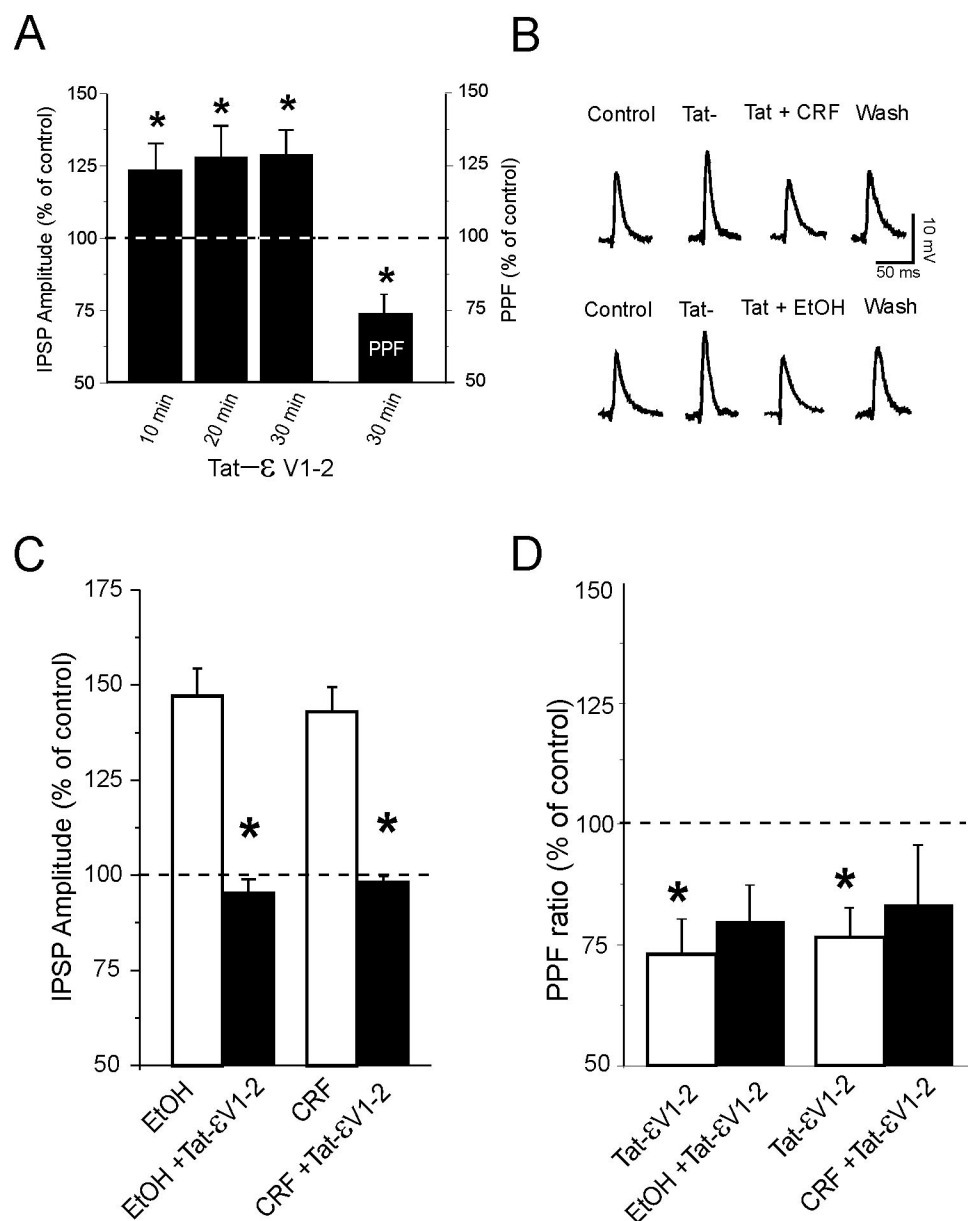

**Fig. S1.** Pharmacological antagonism of PKC $\epsilon$  with a PKC $\epsilon$  inhibitor, Tat- $\epsilon$ V1-2 peptide (Tat- $\epsilon$ V1-2; 500 nM), increases GABAergic transmission in CeA but blocks CRF (200 nM) and ethanol (44 mM) effects. (A) Superfusion of the inhibitor alone increased the evoked IPSP amplitudes and significantly decreased the paired pulse ratio of IPSPs in 5 CeA neurons from PKC $\epsilon$ <sup>+/+</sup> mice. \*,  $P < 0.05$  by one group  $t$ -tests compared to control IPSP amplitude of 100% (dashed line). (B) Representative evoked IPSPs recorded under various treatment conditions as noted. The PKC $\epsilon$  inhibitor (Tat- $\epsilon$ V1-2) enlarged the baseline evoked IPSPs and reversed the usual increase of IPSP amplitudes by both CRF (Upper) and ethanol (Lower). (C) Pretreatment of CeA neurons with Tat- $\epsilon$ V1-2 completely blocked both the CRF- and ethanol-induced increase in mean IPSP amplitudes (\*,  $P < 0.05$ , unpaired, two-tailed,  $t$  tests). (D) Tat- $\epsilon$ V1-2 also prevented CRF- and ethanol-induced decreases in PPF of IPSPs, confirming that the presynaptic action of CRF and ethanol at GABAergic synapses in the CeA is mediated by PKC $\epsilon$ .
